# Supplementary material for: Extremely active α-olefin polymerization and copolymerization with ethylene catalyzed by a dMAO-activated zirconium(iv) dichloro complex having an [OSSO]-type ligand
Source: Royal Society of Chemistry journal article supplement (doi:10.1039/c5ra20846g), 2015-01-01
Supplement: c5ra20846g1.pdf [file c5ra20846g1.pdf]

Electronic Supplementary Information

Entitled

**Extremely Active  $\alpha$ -Olefin Polymerization and Copolymerization with Ethylene  
Catalyzed by dMAO-Activated Zirconium(IV) Dichloro Complex Having an  
[OSSO]-Type Ligand**

Tomoyuki Toda,<sup>a</sup> Norio Nakata,<sup>a</sup> Tsukasa Matsuo,<sup>b,c</sup> and Akihiko Ishii<sup>a</sup>

*<sup>a</sup>Department of Chemistry, Graduate School of Science and Engineering, Saitama  
University, Shimo-okubo, Sakura-ku, Saitama 338-8570, Japan*

*<sup>b</sup>Functional Elemento-Organic Chemistry Unit, RIKEN Advanced Science Institute, 2-1  
Hirosawa, Wako, Saitama 351-0198, Japan*

*<sup>c</sup>Department of Chemistry, Faculty of Science and Engineering, Kinki University,  
Higashi-osaka, Osaka 577-8502, Japan*

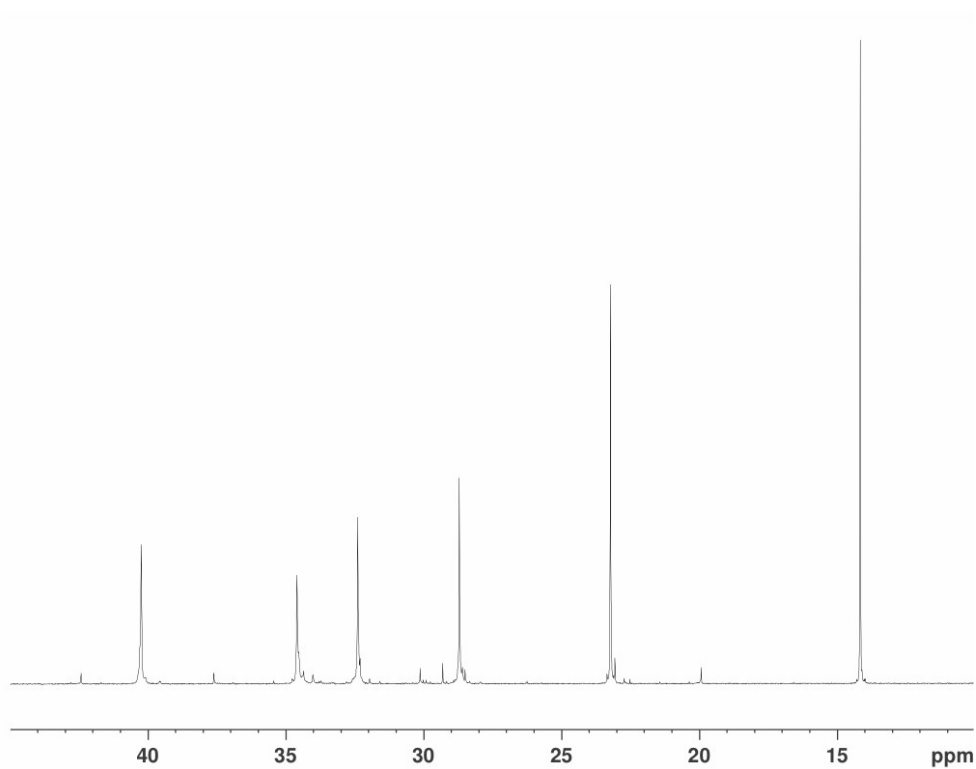

**Figure S1.**  $^{13}\text{C}\{^1\text{H}\}$  NMR spectra of poly(1-hexene) at 25 °C (Table 1, Run 1).

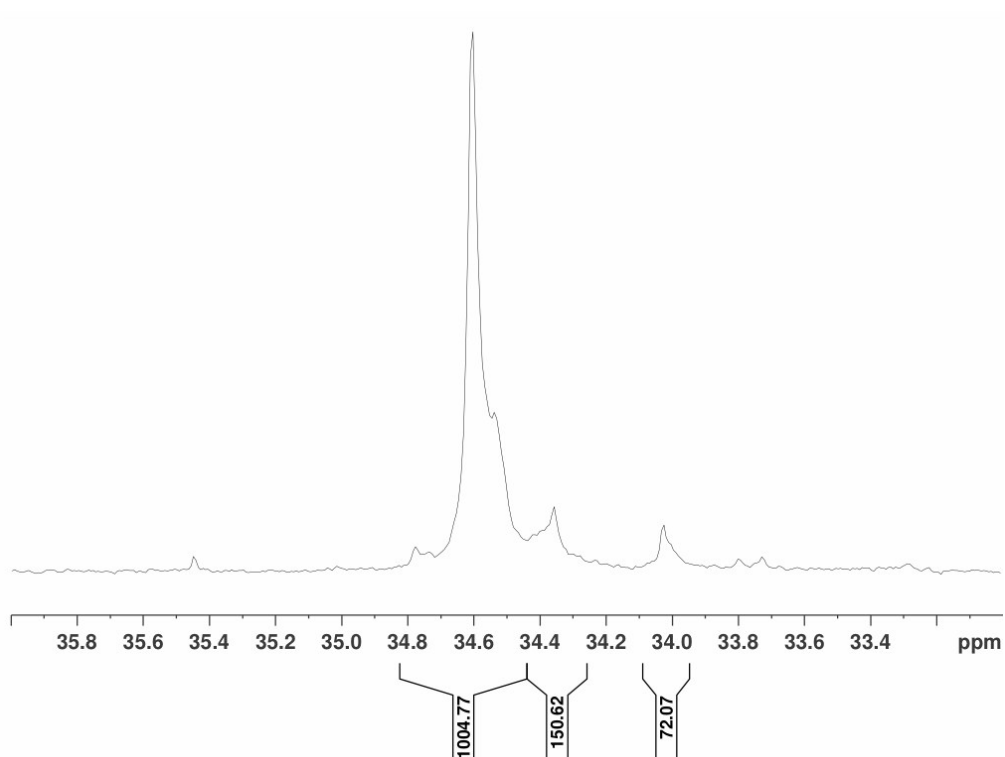

**Figure S2.**  $^{13}\text{C}\{^1\text{H}\}$  NMR spectra of poly(1-hexene) at 25 °C (Table 1, Run 1).

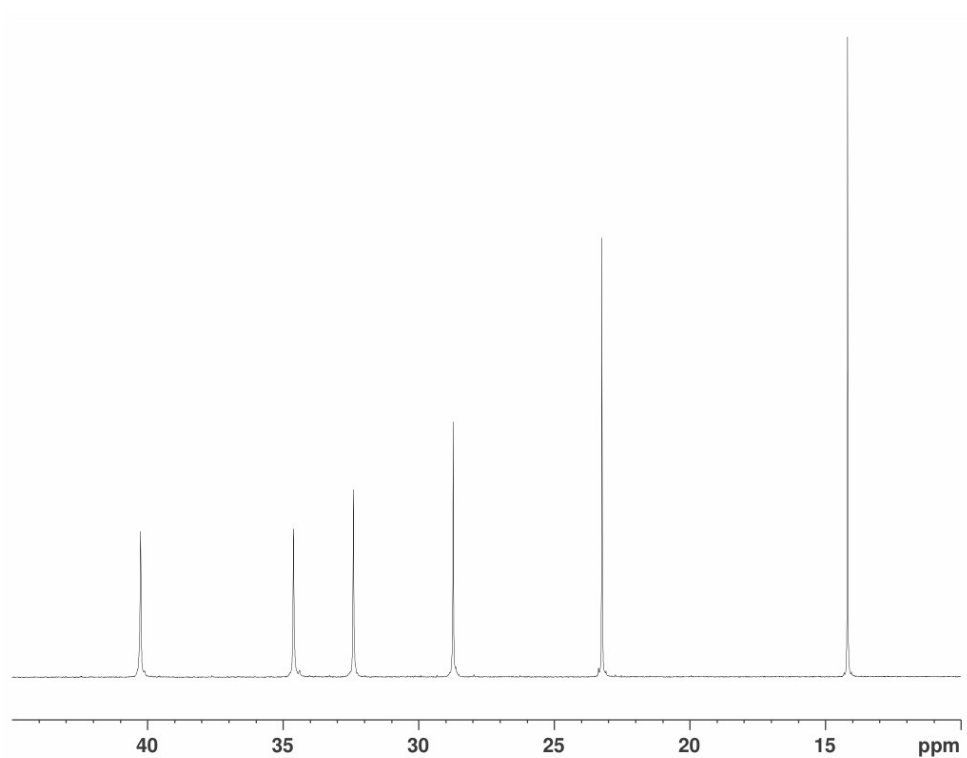

**Figure S3.**  $^{13}\text{C}\{^1\text{H}\}$  NMR spectra of poly(1-hexene) at 0 °C (Table 1, Run 3).

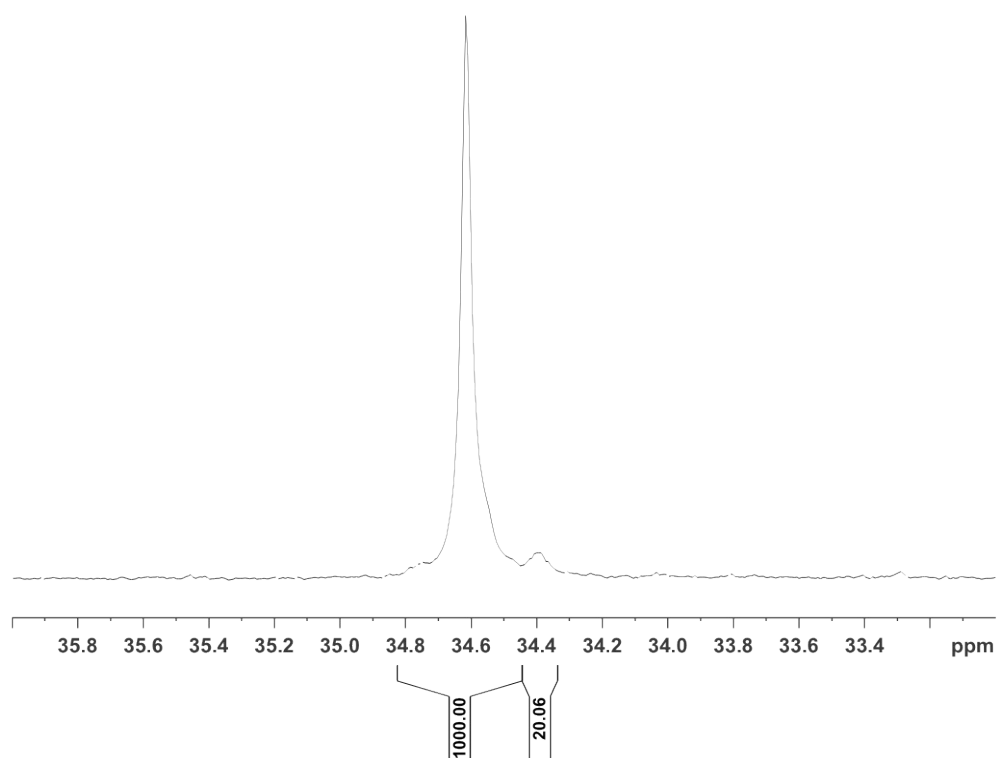

**Figure S4.**  $^{13}\text{C}\{^1\text{H}\}$  NMR spectra of poly(1-hexene) at 0 °C (Table 1, Run 3).

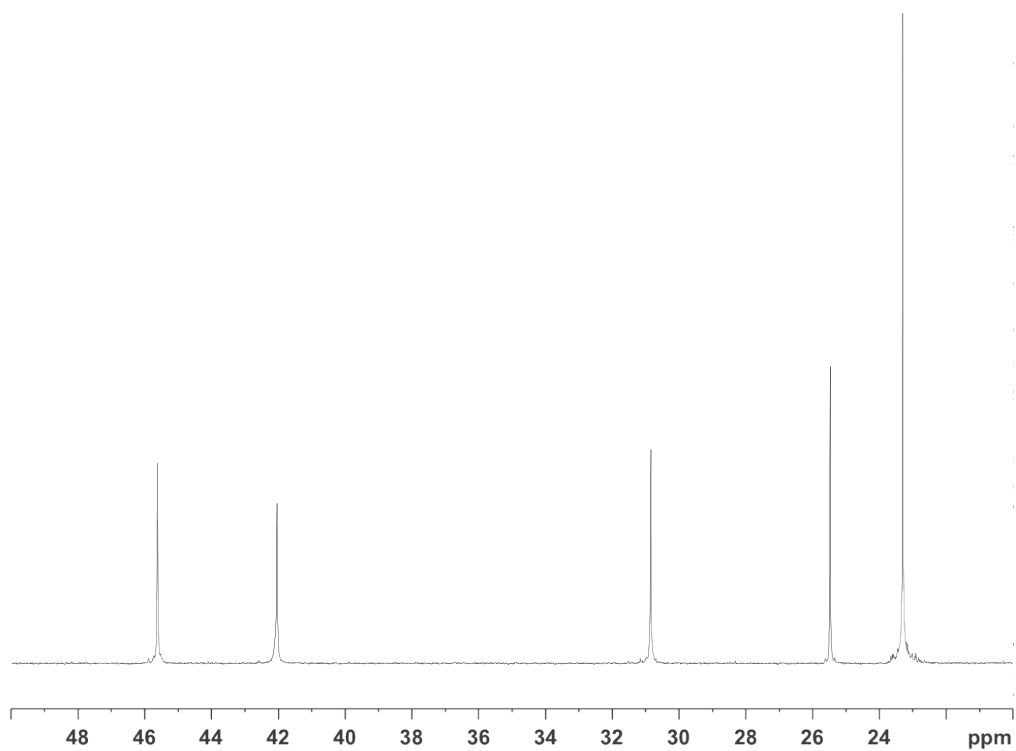

**Figure S5.**  $^{13}\text{C}\{^1\text{H}\}$  NMR spectrum of poly(4-MP) at 25 °C (Table 2, Run 1).

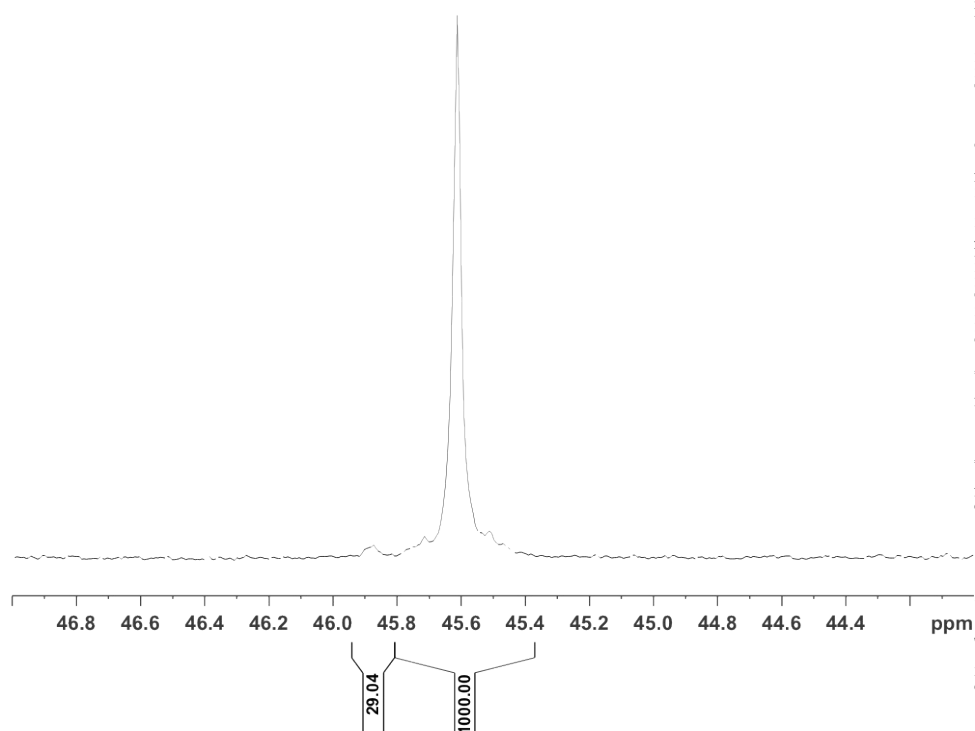

**Figure S6.**  $^{13}\text{C}\{^1\text{H}\}$  NMR spectrum of poly(4-MP) at 25 °C (Table 2, Run 1).

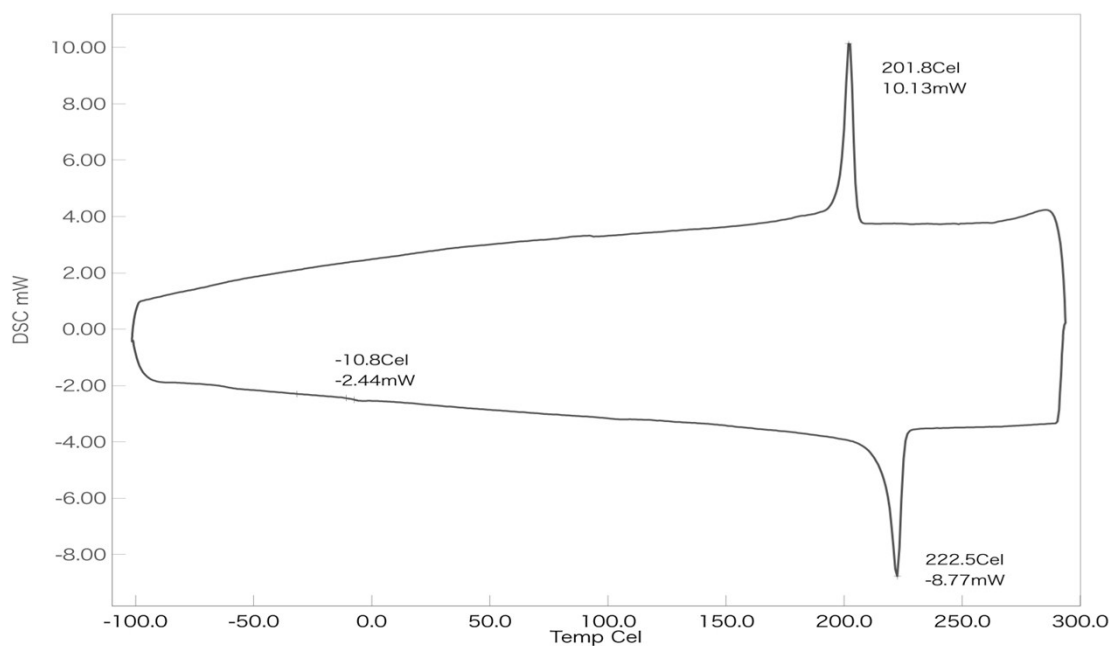

**Figure S7.** GPC curves of poly(4-MP) at 25 °C (Table 2, Run 1).

**Figure S8.**  $^{13}\text{C}\{^1\text{H}\}$  NMR spectrum of poly(4-MP) at 40 °C (Table 2, Run 2).

**Figure S9.**  $^{13}\text{C}\{^1\text{H}\}$  NMR spectrum of poly(4-MP) at 40 °C (Table 2, Run 2).

**Figure S10.** GPC curves of poly(4-MP) at 40 °C (Table 2, Run 2).

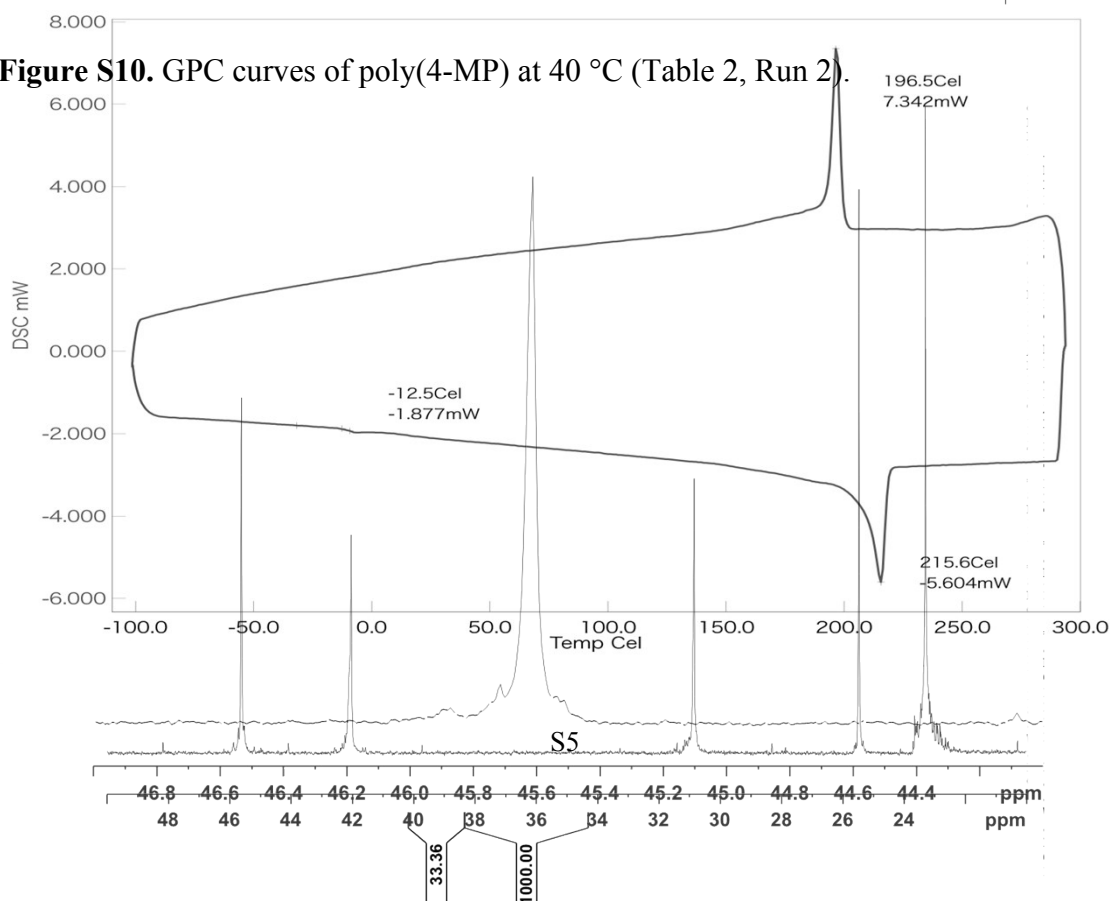

**Figure S11.**  $^{13}\text{C}\{^1\text{H}\}$  NMR spectrum of poly(4-MP) at 70 °C (Table 2, Run 3).

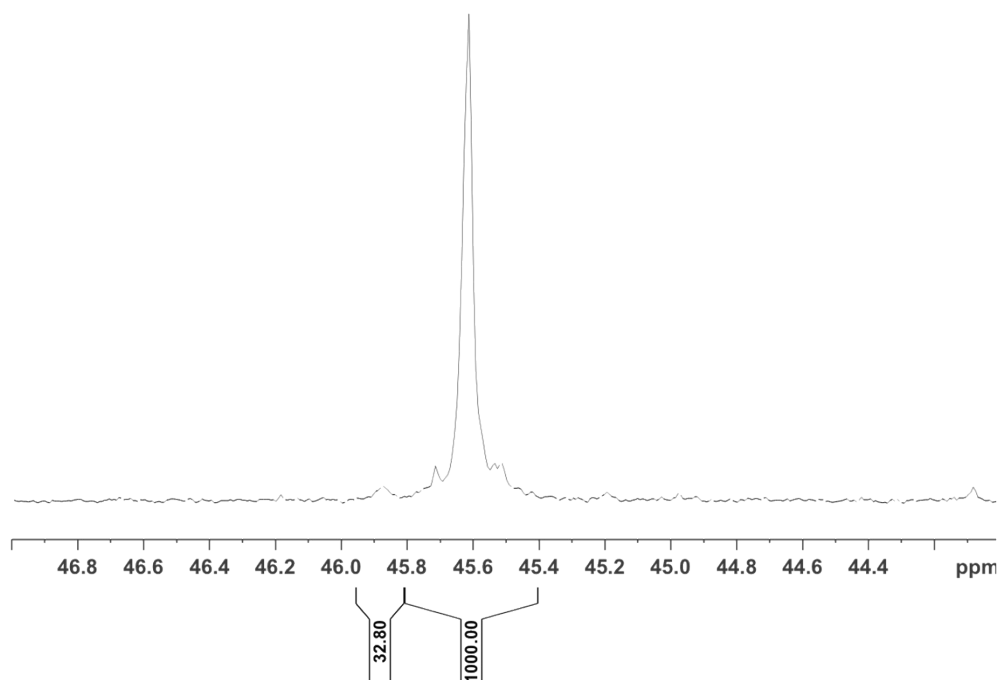

**Figure S12.**  $^{13}\text{C}\{^1\text{H}\}$  NMR spectrum of poly(4-MP) at 70 °C (Table 2, Run 3).

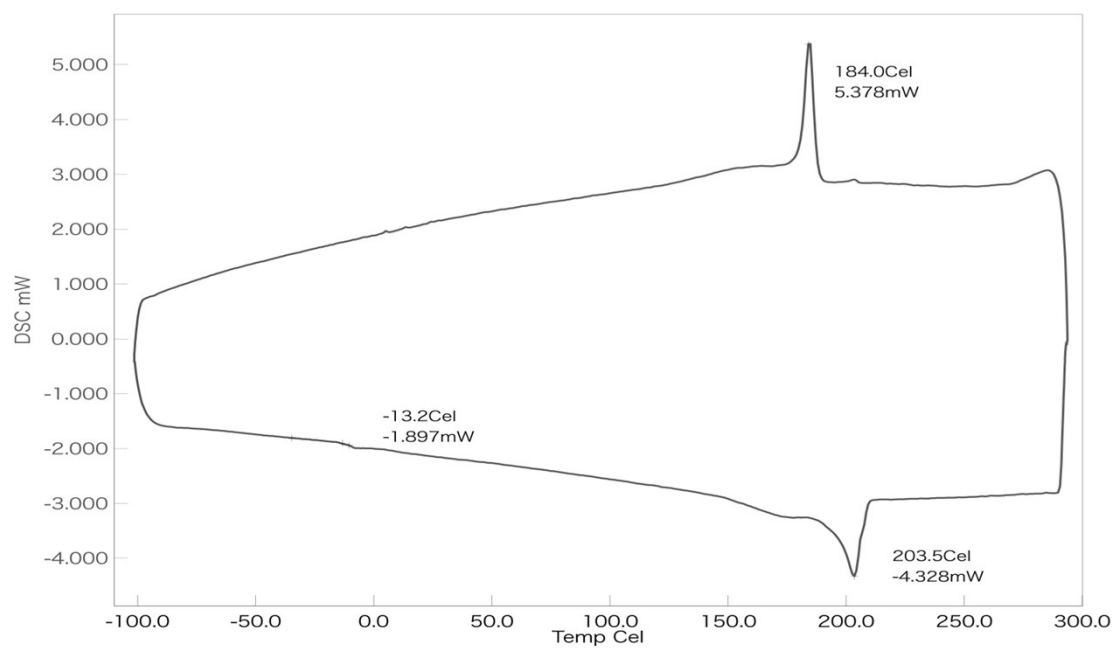

**Figure S13.** GPC curves of poly(4-MP) at 70 °C (Table 2, Run 3).

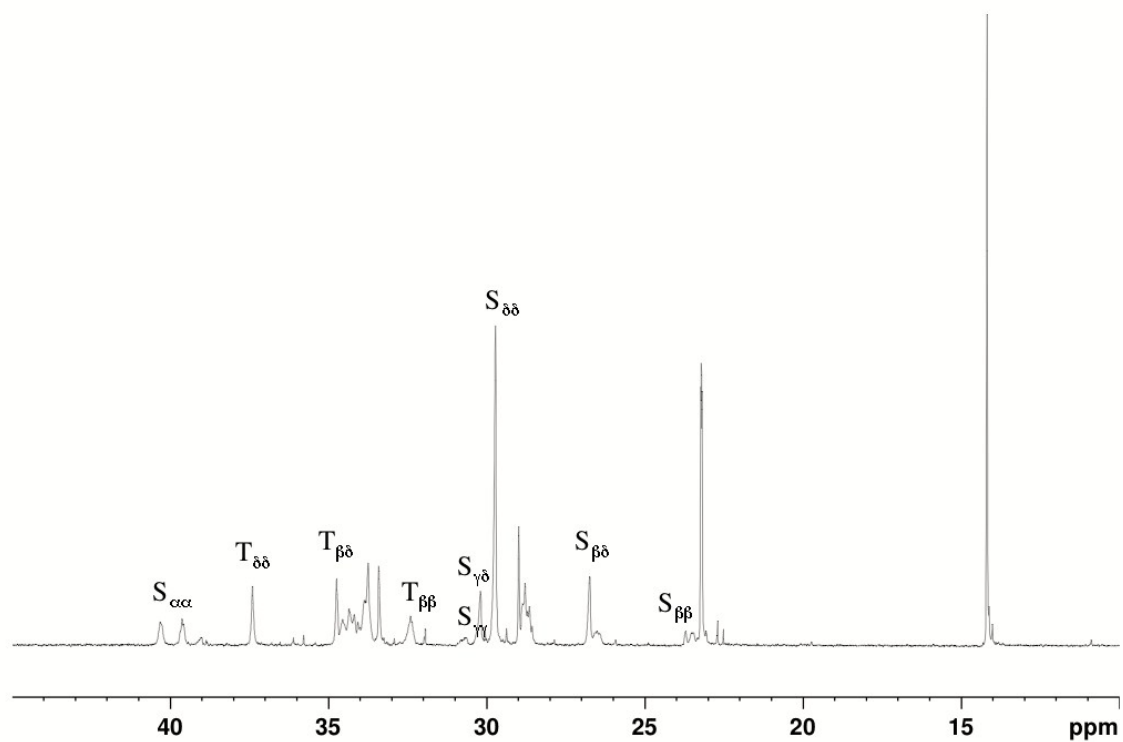

**Figure S14.**  $^{13}\text{C}\{^1\text{H}\}$  NMR spectrum of ethylene/1-hexene copolymer (Table 3, Run 1).

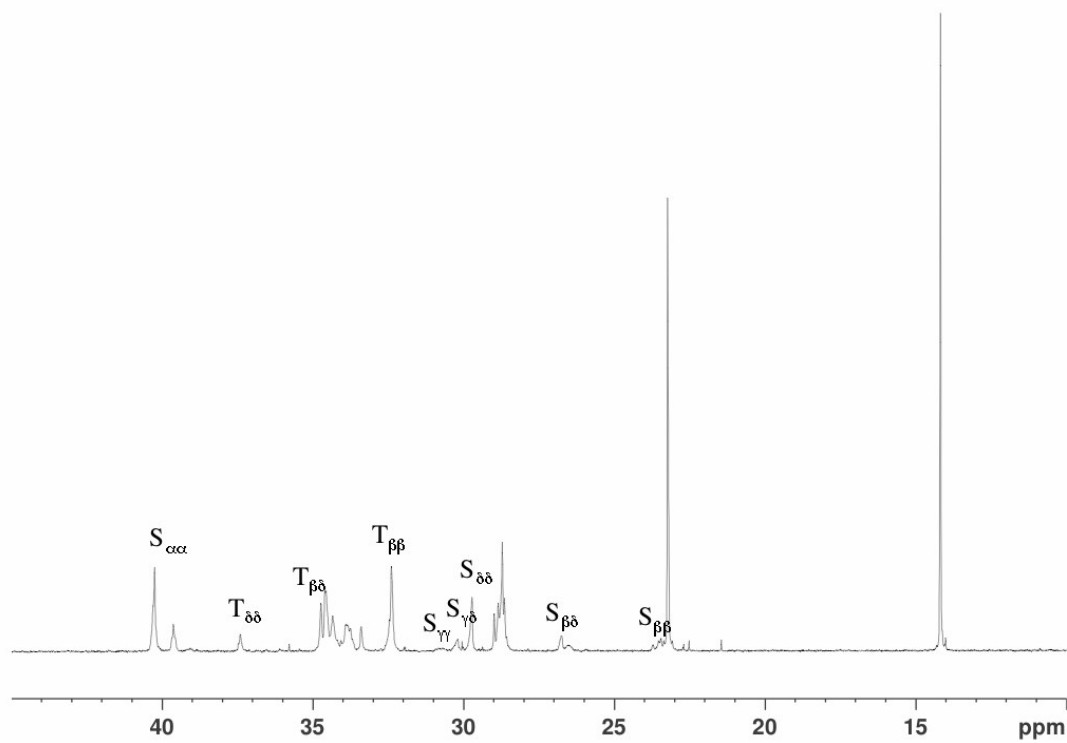

**Figure S15.**  $^{13}\text{C}\{^1\text{H}\}$  NMR spectrum of ethylene/1-hexene copolymer (Table 3, Run 2).

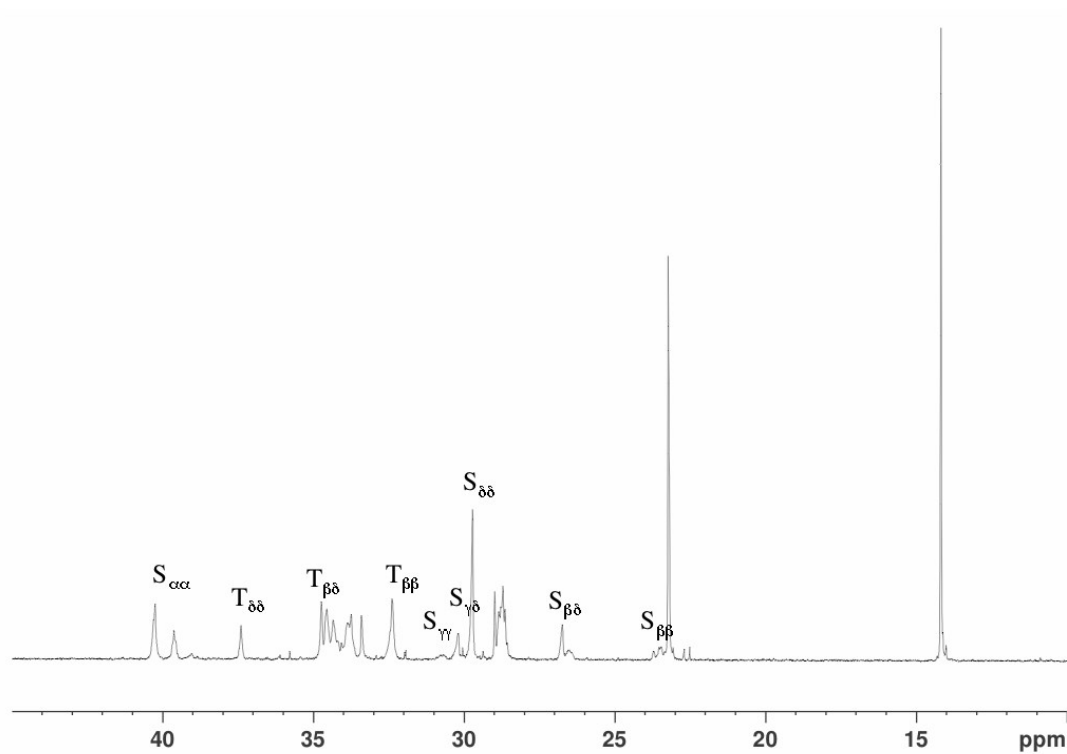

**Figure S16.**  $^{13}\text{C}\{^1\text{H}\}$  NMR spectrum of ethylene/1-hexene copolymer (Table 3, Run 3).
